# Supplementary material for: A Snapshot of the Microbiome of a Portuguese Abandoned Gold Mining Area
Source: MDPI journal article supplement (doi:10.3390/app14010226), 2023-12-26
Supplement: s1 [file s1]

---

# A Snapshot of the Microbiome of a Portuguese Abandoned Gold Mining Area

João Trovão <sup>1,2\*</sup>, Fabiana Soares <sup>1</sup>, Diana Sofia Paiva <sup>1</sup>, João Pratas <sup>3</sup> and António Portugal <sup>1,2,4\*</sup>

<sup>1</sup> Centre for Functional Ecology (CFE) – Science for People & the Planet, Department of Life Sciences, University of Coimbra, Calçada Martim de Freitas, 3000-456, Coimbra, Portugal

<sup>2</sup> TERRA – Associate Laboratory for Sustainable Land Use and Ecosystem Services, Department of Life Sciences, University of Coimbra, Calçada Martim de Freitas, 3000-456, Coimbra, Portugal.

<sup>3</sup> Geosciences Center, Department of Earth Sciences, University of Coimbra, 3030-790 Coimbra, Portugal

<sup>4</sup> FitoLab – Laboratory for Phytopathology, Instituto Pedro Nunes (IPN), Rua Pedro Nunes, 3030-199 Coimbra, Portugal.

\* Correspondence: jtrovaosb@gmail.com (J.T.); aportuga@bot.uc.pt (A.P.);

## Supplementary Materials

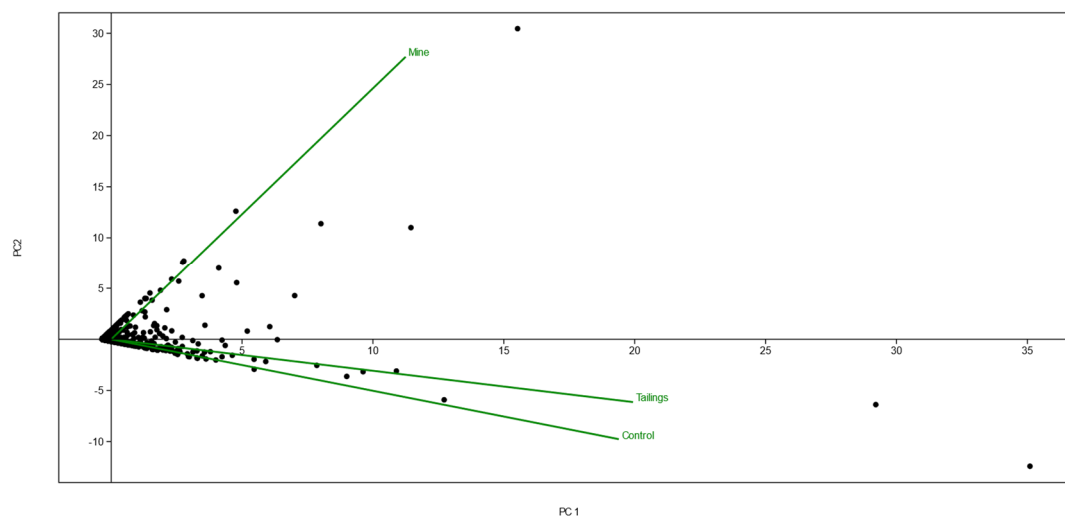

Supplementary Figure S1. Bacteria biplot PCA results.

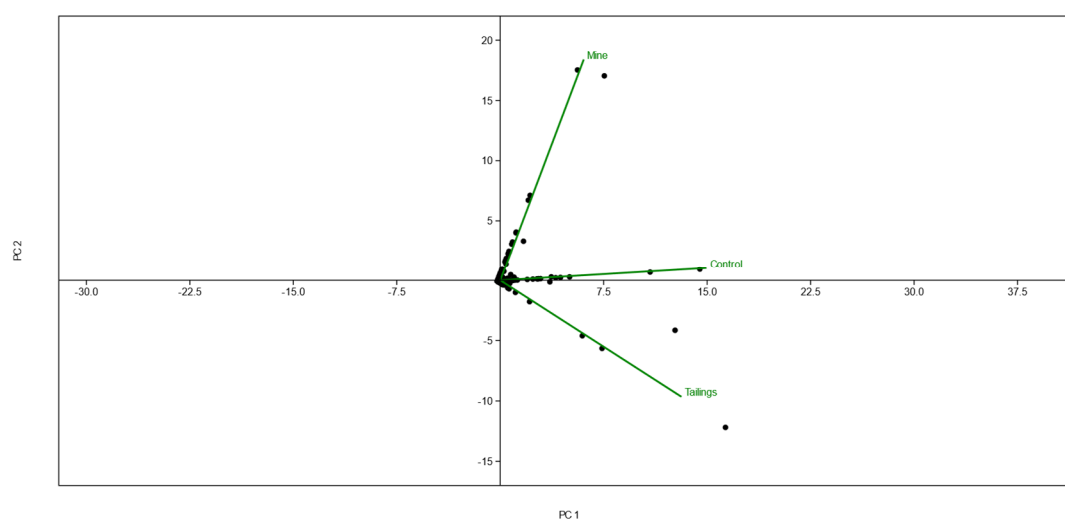

Supplementary Figure S2. Fungi biplot PCA results.
